# Supplementary material
Source: PubMed Central journal article supplement (PMC3079548)
Supplement: NIHMS258821-supplement-11.pdf [file NIHMS258821-supplement-11.pdf]

**Table S1****CLP** **GFP<sup>+</sup>;Lin<sup>-</sup>;IL-7Ra<sup>+</sup>;Sca-1<sup>lo</sup>;c-kit<sup>lo</sup>;PI<sup>-</sup>**

| Antibody           | Company       | Catalog #  | Lot     | Concentration |
|--------------------|---------------|------------|---------|---------------|
| IL7-Ra-Alexa647    | Biologend     | 121109     | B112364 | 1:50          |
| B220-PE            | BD Pharmingen | 553090     | 77748   | 1:100         |
| CD3-PE             | BD Pharmingen | 553064     | 14742   | 1:100         |
| CD4-PE             | BD Pharmingen | 553653     | 892     | 1:100         |
| CD8-PE             | BD Pharmingen | 553033     | 20319   | 1:100         |
| Mac-1-PE           | BD Pharmingen | 553311     | 40130   | 1:100         |
| Gr-1-PE            | BD Pharmingen | 553128     | 57890   | 1:100         |
| Ter119-PE          | BD Pharmingen | 553673     | 21115   | 1:100         |
| Sca-1-PE-Cy7       | Biologend     | 122513     | B112262 | 1:50          |
| c-kit-APC-Alexa750 | eBioscience   | 27-1171-82 | E023108 | 1:100         |

**CMP** **GFP<sup>+</sup>;Lin<sup>-</sup>;IL-7Ra<sup>-</sup>;Sca-1<sup>-</sup>;c-kit<sup>+</sup>;CD34<sup>+</sup>;CD16/32<sup>lo</sup>;PI<sup>-</sup>**

| Antibody            | Company       | Catalog #  | Lot     | Concentration |
|---------------------|---------------|------------|---------|---------------|
| IL7-Ra-PE           | eBioscience   | 12-1271-81 | E014301 | 1:50          |
| B220-PE             | BD Pharmingen | 553090     | 77748   | 1:100         |
| CD3-PE              | BD Pharmingen | 553064     | 14742   | 1:100         |
| CD4-PE              | BD Pharmingen | 553653     | 892     | 1:100         |
| CD8-PE              | BD Pharmingen | 553033     | 20319   | 1:100         |
| IgM-PE              | eBioscience   | 12-5890-81 | E012879 | 1:100         |
| Gr-1-PE             | BD Pharmingen | 553128     | 57890   | 1:100         |
| CD19-PE             | BD Pharmingen | 557399     | 20318   | 1:100         |
| Ter119-PE           | BD Pharmingen | 553673     | 21115   | 1:100         |
| Sca-1-PE            | BD Pharmingen | 553336     | 4949    | 1:50          |
| c-kit-APC-Alexa750  | eBioscience   | 27-1171-82 | E023108 | 1:100         |
| CD34-Biotin         | BD Pharmingen | 553334     | 58032   | 1:100         |
| Streptavidin-PE-Cy7 | eBioscience   | 25-4317-82 | E014996 | 1:100         |
| CD16/32-APC         | eBioscience   | 17-0161-81 | E007261 | 1:100         |

**B cells** **GFP<sup>+</sup>;B220<sup>+</sup>;PI<sup>-</sup>**

| Antibody | Company       | Catalog # | Lot   | Concentration |
|----------|---------------|-----------|-------|---------------|
| B220-APC | BD Pharmingen | 553092    | 61962 | 1:100         |

**T cells** **GFP<sup>+</sup>;CD4<sup>+</sup>;CD8<sup>+</sup>;PI<sup>-</sup>**

| Antibody | Company       | Catalog # | Lot   | Concentration |
|----------|---------------|-----------|-------|---------------|
| CD4-APC  | BD Pharmingen | 553051    | 78758 | 1:100         |
| CD8-APC  | BD Pharmingen | 553035    | 65993 | 1:100         |

**Macrophages** **GFP<sup>+</sup>;F4/80<sup>+</sup>;PI<sup>-</sup>**

| Antibody  | Company     | Catalog #  | Lot        | Concentration |
|-----------|-------------|------------|------------|---------------|
| F4/80-APC | eBioscience | 17-4801-82 | E07285-269 | 1:100         |

**GFP<sup>+</sup> intestinal epithelium****GFP<sup>+</sup>;CD45<sup>-</sup>;PI<sup>-</sup>**

| Antibody | Company       | Catalog # | Lot   | Concentration |
|----------|---------------|-----------|-------|---------------|
| CD45-APC | BD Pharmingen | 559864    | 30755 | 1:100         |
