# Supplementary material
Source: PubMed Central journal article supplement (PMC3079548)
Supplement: NIHMS258821-supplement-12.pdf [file NIHMS258821-supplement-12.pdf]

**Supplemental Table 2**

| <b>Gene name</b>  | <b>Accession #</b> | <b>Forward Primer (5' →3')</b> | <b>Reverse Primer (5' →3')</b> |
|-------------------|--------------------|--------------------------------|--------------------------------|
| <b>Apc</b>        | NM_007462          | TAGGAAGAGCAGCGCAGACA           | AGACCCGGATGGCGTTAG             |
| <b>Cald1</b>      | NM_145575          | ATGCTTTTCAGCCCAGCCGT           | TTCGTTCTCCGTCTCCCCGC           |
| <b>Camk1d</b>     | NM_177343          | GGCTTCTCGCAGGGTGGCTT           | CCGGAGTGCGGTTACCTGT            |
| <b>Col7a</b>      | NM_007738          | CAGAGCAGCTGCGTCGCTTG           | AAGGCCCTGTTTGCGGCTCT           |
| <b>Dnmbp</b>      | NM_028029          | TCCATCGGGGAGACCTGGTGA          | TCGGCTCCGAGAGGAGAGGC           |
| <b>E-cadherin</b> | NM_009864          | GTCAACACCTACAACGCTGCC          | GTTGTGCTCAAGCCTTCGC            |
| <b>Epcam</b>      | NM_008532          | ACCGCCGGAGTCCGAAGAAC           | CGCCTCTTGAAGCGCAGTCT           |
| <b>Epha2</b>      | NM_010139          | GGACCGAAGCACCACTCCC            | GGCATCCCCCTTCTTGCGGT           |
| <b>F4/80</b>      | NM_010130          | ATGAGTGCACCCAAGATCCATT         | TCCATATCCTTGGGAGCCTTCT         |
| <b>GAPDH</b>      | NM_008084          | GTCAACACCTACAACGCTGCC          | GTTGTGCTCAAGCCTTCGC            |
| <b>Mib2</b>       | NM_145124          | TCGGGGCATGCGTTGGAAGT           | TCAGCGTAACCGGGCGTGAG           |
| <b>Nfix</b>       | NM_001081982       | ACCAAGCGCCCCAAGTCCAT           | CAGGGCCTGCATCCACGTCA           |
| <b>Slc5a1</b>     | NM_019810          | ACCCATGTCCAGCACACGCA           | CCCAGGCTTCAGTCCCTGCC           |
| <b>Tspan8</b>     | NM_146010          | AGCTGCAGGCACACGGATCT           | ACAGCTGCTCACACCTGCCA           |
| <b>Villin</b>     | NM_009509          | TCAGGCCTCGGCAAACCCA            | ATGCGCCACACCTGCACTTC           |
