# Supplementary material
Source: PubMed Central journal article supplement (PMC3079548)
Supplement: NIHMS258821-supplement-13.pdf [file NIHMS258821-supplement-13.pdf]

**Supplementary Table 3**

| <b>Gene</b> | <b>CFH vs Epi</b> | <b>Direction in Metastasis</b> | <b>Reference</b>                                                     |
|-------------|-------------------|--------------------------------|----------------------------------------------------------------------|
| Alcam       | Increased         | Increased                      | Weichert W et al. <i>J. Clin. Pathol.</i> 2004 Nov;57(11):1160-1164  |
| Cdh1        | Decreased         | Decreased                      | Elzagheid A et al. <i>World J. Gastroenterol.</i> 2006, 12:4304-4309 |
| Ctnna1      | Decreased         | Decreased                      | Gofuku J et al. <i>Am. J. Pathol.</i> 1999 Jan; 111(1):29-37         |
| Ctnnb1      | Decreased         | Decreased                      | Takayama T et al. <i>Br. J. Cancer</i> 1998 Feb;77(4):605-613        |
| Flt4        | Increased         | Increased                      | Jayasinghe C et al. <i>Oncol. Rep.</i> 2009 Nov;22(5):1093-1100      |
| MMP7        | Decreased         | Decreased                      | Garcia MF et al. <i>Int. J. Exp. Pathol.</i> 2010 Aug;91(4):324-334  |
| Runx1       | Increased         | Increased                      | Planagumà J et al., <i>Cancer Res.</i> 2004 Dec 15;64(24):8846-8853  |
| Sparc       | Decreased         | Decreased                      | Liang JF et al. <i>J.Exp. Clin. Cancer Res.</i> 2010 Jun 16;29(1):71 |
